# Supplementary material for: Dehydrocoupling of dimethylamine-borane catalysed by rhenium complexes and its application in olefin transfer-hydrogenations
Source: Royal Society of Chemistry journal article supplement (doi:10.1039/b708913a), 2007-01-01
Supplement: b708913a.pdf [file b708913a.pdf]

**Supporting Information**

**Dehydrocoupling of Dimethylamine-Borane Catalysed by Rhenium  
Complexes and its Application in Olefin Transfer-Hydrogenations**

**Yanfeng Jiang, Heinz Berke\***

*University of Zürich, Winterthurerstr. 190, CH-8057 Zürich, Switzerland*

## **Experimental Details**

### **General Experimental.**

All manipulations were performed under an atmosphere of dry nitrogen using standard Schlenk techniques or in a glovebox (M. Braun 150B-G-II) filled with dry nitrogen. Solvents were freshly distilled under N<sub>2</sub> by employing standard procedures and were degassed by freeze-thaw cycles prior to use. [Re(NO)( $\eta^2$ -H<sub>2</sub>)(Br)<sub>2</sub>(P<sup>i</sup>Pr<sub>3</sub>)<sub>2</sub>] (**1a**), [Re(NO)( $\eta^2$ -H<sub>2</sub>)(Br)<sub>2</sub>(PCy<sub>3</sub>)<sub>2</sub>] (**1b**), [Re(NO)(P<sup>i</sup>Pr<sub>3</sub>)<sub>2</sub>(CH<sub>3</sub>CN)(Br)<sub>2</sub>] (**2a**), [Re(NO)(PCy<sub>3</sub>)<sub>2</sub>(CH<sub>3</sub>CN)(Br)<sub>2</sub>] (**2b**) were prepared according to reported procedures.<sup>1</sup> Me<sub>2</sub>NH·BH<sub>3</sub> was purchased from Fluka and used without further purification..

### **Analysis.**

<sup>1</sup>H NMR, <sup>13</sup>C{<sup>1</sup>H} NMR, <sup>31</sup>P{<sup>1</sup>H} NMR and <sup>11</sup>B{<sup>1</sup>H} NMR data were recorded on a Varian Gemini-300 spectrometer. Chemical shifts are expressed in parts per million (ppm) referenced to the deuterated solvent used. All chemical shifts for the <sup>31</sup>P{<sup>1</sup>H} NMR data are reported downfield in ppm relative to external 85% H<sub>3</sub>PO<sub>4</sub> at 0.0 ppm. All chemical shifts for the <sup>11</sup>B{<sup>1</sup>H} NMR data are reported in ppm relative to external BF<sub>3</sub> in diethyl ether at 0.0 ppm. Signal patterns are reported as follows: s, singlet; d, doublet; t, triplet; m, multiplet. IR spectra were obtained by using ATR methods with a Bio-Rad FTS-45 FTIR spectrometer.

### **Synthesis of [Re(NO)(P<sup>i</sup>Pr<sub>3</sub>)<sub>2</sub>( $\eta^2$ -C<sub>2</sub>H<sub>4</sub>)(Br)<sub>2</sub>] (**3a**)**

In Young-Schlenk flask, 150 mg of rhenium complex **1a** (0.21 mmol) and 5 mL dioxane were added. After freezing the solution, the N<sub>2</sub> atmosphere was exchanged with 920 mbar of ethylene gas. The mixture was stirred at 60 °C for 30 min and pink precipitate formed. After stirring at rt for another 10 h, pink precipitate **3a** was separated (146 mg, 92%). <sup>1</sup>H-NMR (300.1 MHz, toluene-d<sub>8</sub>, ppm):  $\delta$  1.17-1.24 (m, 18H, CH<sub>3</sub>), 1.26-1.33 (m, 18H, CH<sub>3</sub>), 2.37 (td, 2H, <sup>2</sup>J = 3 Hz, <sup>3</sup>J = 12 Hz, CH<sub>2</sub>=), 2.94 (td, 2H, <sup>2</sup>J = 3 Hz, <sup>3</sup>J = 12 Hz, CH<sub>2</sub>=), 3.06 (m, 6H, CH). <sup>13</sup>C{<sup>1</sup>H} NMR (75.5

MHz, toluene- $d_8$ , ppm) :  $\delta$  19.6 (s, CH<sub>3</sub>), 19.9 (s, CH<sub>3</sub>), 26.2 (t,  $J$ (PC) = 10.6 Hz, CH), 39.5 (br, CH<sub>2</sub>=CH<sub>2</sub>).  $^{31}\text{P}\{^1\text{H}\}$  NMR (121.5 MHz, toluene- $d_8$ , ppm):  $\delta$  -12.3 (s); IR (ATR):  $\nu$  (NO): 1693  $\text{cm}^{-1}$ ; Anal. Calcd. for C<sub>20</sub>H<sub>46</sub>Br<sub>2</sub>NOP<sub>2</sub>Re: C, 33.19; H, 6.41 ; N, 1.94. Found: C,33.39; H, 6.52; N, 1.93.

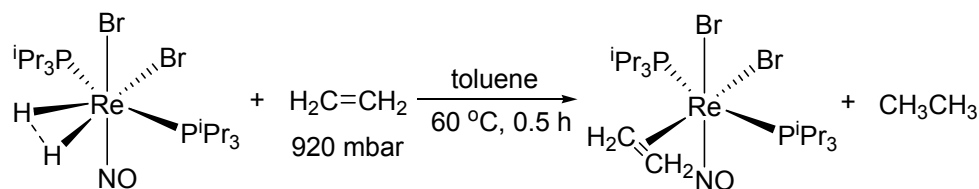

### Synthesis of [Re(NO)(PCy<sub>3</sub>)<sub>2</sub>( $\eta^2$ -C<sub>2</sub>H<sub>4</sub>)(Br)<sub>2</sub>] (**3b**)

In Young-Schlenk flask, 450 mg of rhenium complex **1b** (0.47 mmol) and 10 mL dioxane were added. After freezing the solution, the N<sub>2</sub> atmosphere was exchanged with 800 mbar of ethylene gas. The mixture was stirred at 70 °C for 15 h and brown-pink precipitate was collected (420 mg, 89%).<sup>2</sup>

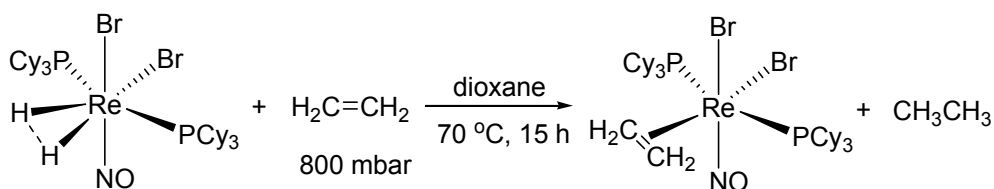

### **Catalytic Dehydrocoupling of Me<sub>2</sub>NH·BH<sub>3</sub> by Rhenium Complexes**

**Catalytic Dehydrocoupling of Me<sub>2</sub>NH·BH<sub>3</sub>.** To a solution of Me<sub>2</sub>NH·BH<sub>3</sub> (59 mg, 1.0 mmol) in dioxane (0.5 mL), a catalytic amount of the appropriate complex (0.01 mmol) was added and the solution was heated at 85 °C. After 4 h, the reaction mixture was analyzed by <sup>11</sup>B-NMR to determine the conversion of Me<sub>2</sub>NH·BH<sub>3</sub> into *N,N*-dimethylcycloborazane.

### **Catalytic Transfer-hydrogenation of Olefins by Rhenium Complexes**

**Catalytic transfer-hydrogenation of alkenes.** To a solution of Me<sub>2</sub>NH·BH<sub>3</sub> (59 mg, 1.0 mmol) and the olefin (1.0 mmol) in dioxane (0.5 mL), a catalytic amount of the appropriate complex (0.01 mmol) was added and the solution was stirred vigorously at 85 °C. After appropriate reaction time the product formation was analyzed by <sup>11</sup>B{<sup>1</sup>H} NMR, <sup>1</sup>H NMR and <sup>13</sup>C{<sup>1</sup>H} NMR spectroscopy.

### **References**

1. D. Gusev, A. Llamazares, G. Artus, H. Jacobsen, H. Berke, *Organometallics*, 1999, **18**, 75; A. Choualeb, O. Blacque, H. W. Schmalle, H. Berke, *Dalton Trans*, submitted.
2. A. Choualeb, E. Maccaroni, H. W. Schmalle, H. Berke, *Dalton Trans*, to be submitted
